# Supplementary material
Source: PubMed Central journal article supplement (PMC4850113)
Supplement: NIHMS772928-supplement-Methods_and_Material.pdf [file NIHMS772928-supplement-Methods_and_Material.pdf]

## Material and Methods

### *Materials*

All reagents, analytical grade, were obtained from Thermo Fisher Scientific (Waltham, MA) unless stated otherwise. Bovine serum albumin (BSA) was obtained from Sigma-Aldrich (St. Louis, MO). Clopidogrel was provided as 75 mg Plavix® tablets from Bristol-Myers Squibb/Sanofi Pharmaceutical partnership (New York, NY). Hank's balanced salt solution (HBSS) and PBS were purchased from Mediatech Inc. (Manassas, VA). BD FACS™ lysing solution, PE-conjugated rat anti-mouse CD41 (clone MWReg30), FITC-conjugated rat anti-mouse CD41 (clone MWReg30) and FITC-conjugated rat anti-mouse P-selectin (clone RB40.34) and were purchased from BD Bioscience (San Jose, CA). PE-conjugated rat anti-mouse CD11b (clone M1/70) and FITC-conjugated rat anti-mouse CD11b (clone M1/70.15) and the isotype control IgG2b were purchased from Invitrogen (Grand Island, NY). Isotype controls, IgG1 $\kappa$  and IgG1 $\lambda$ , were obtained from BD Bioscience (San Jose, CA).

### *Animals and treatments*

Animal procedures and handling adhered to National Institutes of Health standards and were approved by the Institutional Animal Care and Use Committee at Temple University School of Medicine (Philadelphia, PA, USA). Male wild-type and P2Y<sub>12</sub> deficient pathogen-free C57BL/6 mice (weight, 25-30 g) were obtained from Schering-Plough Corporation (Kenilworth, NJ)<sup>1-4</sup>. P2Y<sub>1</sub> deficient pathogen-free C57BL/6 male mice were generated by subcontract with Lexicon Genetics Inc. (Woodlands, TX) through knockout constructs as described previously<sup>5-7</sup>. Animals were housed in a climate-controlled facility and given free access to food and water.

The cecal ligation and double puncture (CLP) were performed on isoflurane-anesthetized animals as described previously<sup>5-7</sup>. Sham control animals underwent a laparotomy without ligation or double puncture. Experiments were performed in P2Y<sub>12</sub>, P2Y<sub>1</sub> KO, and wild-type mice that were randomly assigned to one of four groups for wild-type or KO: wild-type and KO sham control group (6 animals per group); wild-type and KO undergoing CLP (CLP group, 6 animals per group).

Clopidogrel was orally administrated to wild-type and P2Y<sub>12</sub> KO (6 animals per group) with a loading dose of 30 mg/kg the day before surgery and a maintenance dose of 10 mg/kg two hours before surgery. Sham mice received the same doses of clopidogrel. After the procedure but prior to emergence, sham and CLP mice were fluid-resuscitated (1 ml/mouse sterile saline, subcutaneously).

At 24 hours post-surgery, mice were anesthetized and blood samples were collected by cardiac puncture (10:1 in 3.8% sodium citrate) for hematology studies (Hemavet® Multispecies Hematology System, Drew Scientific, Inc. Oxford, CT). All mice were euthanized by cardiac puncture and exsanguination. Lungs were collected and fixed or frozen immediately in liquid nitrogen.

### *Platelet-leukocyte aggregate formation and P-selectin expression in whole blood*

Murine blood samples were incubated with either FITC-conjugated anti-mouse CD11b and PE-conjugated anti-mouse CD41 or with FITC-conjugated anti-mouse P-selectin for

20 minutes at 25 °C. The reaction was stopped by adding BD FACS™ lysing solution (1:10 in PBS). Samples were kept at 4°C prior to analysis. Flow cytometry was performed using a FACSCalibur analyzer and data were analyzed with FlowJo software. Platelet and neutrophil aggregates were discriminated by forward and side light scatter and identified by their positive staining for PE-CD41 or FITC-CD11b, respectively. Events double positive for PE and FITC identified platelet–neutrophil aggregates and were recorded as a percentage of a total of 10,000 gated neutrophils.

#### *Lung histopathology*

Lung sections were paraffin-embedded, cut into 5 µm sections, and stained with hematoxylin and eosin (H&E). Morphological analysis of random fields ( $n = 6$ ) from each section ( $n = 3$  sections/animal) was performed by a second independent, blinded observer using previously described methods<sup>8</sup>. Acute lung injury (ALI) was scored based on four parameters: a) alveolar capillary congestion, b) hemorrhage, c) infiltration or aggregation of neutrophils in the airspace or the vessel wall, and d) thickness of the alveolar wall. Each parameter was graded from 0–4 based on the damage present (0, no or little damage; 1, less than 25% damage; 2, 25–50% damage; 3, 50–75% damage; and 4, more than 75% damage). The degree of ALI was assessed by sum of scores of four parameters.

#### *Myeloperoxidase peroxidation (MPO)*

Lungs were also homogenized and sonicated. After centrifugation (10,000 for 10 minutes at 4°C), MPO levels were detected using a MPO assay kit (Cayman, USA).

#### *Fluorescence microscopy*

Murine lung tissue sections were deparaffinized, and antigen retrieval was achieved by microwaving the tissue slides for 4 min in citrate buffer pH 6.0. The slides were washed and incubated with FITC-conjugated rat anti-mouse CD41<sup>9</sup> or with FITC-conjugated rat anti-mouse CD41 and PE-conjugated rat anti-mouse CD11b. The slides were mounted in Vectashield with DAPI (DNA stain) and imaged using fluorescence microscopy.

#### *Cytokine profiles*

Plasma aliquots from each animal were obtained by blood centrifugation (2,000g for 10 minutes) and utilized for detection of TNF- $\alpha$ , IL-6, IL-10 and MIP-1b plasma levels by the Luminex® System (Allied Biotech, Inc. Ijamsville, MD)<sup>10</sup>.

#### *Statistical analysis*

Differences among groups were statistically analyzed using one-way ANOVA; Bonferroni's Multiple Comparison Test was used as post-test analyses.  $P < 0.05$  was considered to be significant. Data are reported as mean  $\pm$  standard error of the mean (S.E.M.) for each group.

## References

1. Bhavaraju K, Georgakis A, Jin J, Gartner TK, Tomiyama Y, Nurden A, Nurden P, Kunapuli SP. Antagonism of P2Y<sub>1</sub>(2) reduces physiological thromboxane levels. *Platelets*;21:604-609.
2. Foster CJ, Prosser DM, Agans JM, Zhai Y, Smith MD, Lachowicz JE, Zhang FL, Gustafson E, Monsma FJ, Jr., Wiekowski MT, Abbondanzo SJ, Cook DN, Bayne ML, Lira SA, Chintala MS. Molecular identification and characterization of the platelet ADP receptor targeted by thienopyridine antithrombotic drugs. *J Clin Invest*. 2001;107:1591-1598.
3. Kim S, Foster C, Lecchi A, Quinton TM, Prosser DM, Jin J, Cattaneo M, Kunapuli SP. Protease-activated receptors 1 and 4 do not stimulate G(i) signaling pathways in the absence of secreted ADP and cause human platelet aggregation independently of G(i) signaling. *Blood*. 2002;99:3629-3636.
4. Liverani E, Rico MC, Yaratha L, Tsygankov AY, Kilpatrick LE, Kunapuli SP. LPS-induced systemic inflammation is more severe in P2Y<sub>12</sub> null mice. *J Leukoc Biol*. 2013;95:313-323.
5. DeJager L, Pinheiro I, Dejonckheere E, Libert C. Cecal ligation and puncture: the gold standard model for polymicrobial sepsis? *Trends Microbiol*. 2011;19:198-208.
6. Kilpatrick LE, Standage SW, Li H, Raj NR, Korchak HM, Wolfson MR, Deutschman CS. Protection against sepsis-induced lung injury by selective inhibition of protein kinase C-delta (delta-PKC). *J Leukoc Biol*. 2011;89:3-10.
7. Mondrinos MJ, Zhang T, Sun S, Kennedy PA, King DJ, Wolfson MR, Knight LC, Scalia R, Kilpatrick LE. Pulmonary endothelial protein kinase C-delta (PKCdelta) regulates neutrophil migration in acute lung inflammation. *Am J Pathol*. 2014;184:200-213.
8. Chen F, Liu Z, Wu W, Rozo C, Bowdridge S, Millman A, Van Rooijen N, Urban JF, Jr., Wynn TA, Gause WC. An essential role for TH2-type responses in limiting acute tissue damage during experimental helminth infection. *Nat Med*. 2012;18:260-266.
9. Perl M, Chung CS, Lomas-Neira J, Rachel TM, Biffl WL, Cioffi WG, Ayala A. Silencing of Fas, but not caspase-8, in lung epithelial cells ameliorates pulmonary apoptosis, inflammation, and neutrophil influx after hemorrhagic shock and sepsis. *Am J Pathol*. 2005;167:1545-1559.
10. Nunez NP, Oh WJ, Rozenberg J, Perella C, Anver M, Barrett JC, Perkins SN, Berrigan D, Moitra J, Varticovski L, Hursting SD, Vinson C. Accelerated tumor formation in a fatless mouse with type 2 diabetes and inflammation. *Cancer Res*. 2006;66:5469-5476.
